# Supplementary material for: Titanium hydroamination catalysts bearing a 2-aminopyrrolinato spectator ligand: monitoring the individual reaction steps
Source: Royal Society of Chemistry journal article supplement (doi:10.1039/b902038a), 2009-01-01

*Supporting Information for*  
**Titanium Hydroamination Catalysts Bearing a 2-Aminopyrrolinato Spectator Ligand:  
Monitoring the Individual Reaction Steps**

Katharina Weitershaus, Benjamin D. Ward, Raphael Kubiak, Carsten Müller,  
Hubert Wadepohl, Sven Doye,\* and Lutz H. Gade\*

**(a) Kinetic investigations**

The kinetics of the formation of the metallacyclic compound **10** from [Cp\*Ti(N<sup>Xyl</sup>N)(N-2,6-C<sub>6</sub>H<sub>3</sub>Me<sub>2</sub>)] (**5**) and phenylacetylene were investigated by the method of initial rates, which indicated a first order dependence on the concentration of phenylacetylene. Therefore the imido complex **5** (20 μmol) was reacted with 0.5, 1, 2, 3 and 5 molar equivalents of phenylacetylene in toluene-d<sub>8</sub> (0.6 ml) at 10 °C. The reaction was monitored by <sup>1</sup>H NMR spectroscopy and the concentration of the metallacyclic compound **10** was plotted against time. The conversion curve was line-fitted to a first order exponential decay  $A\exp(-x/b)$ ; the initial rate was estimated from  $-A/b$ , derived from differentiation of the fitted line for  $x = 0$ . A plot of the initial rate *versus* alkyne concentration indicated a linear relationship (Figure S1).

**Figure S1**

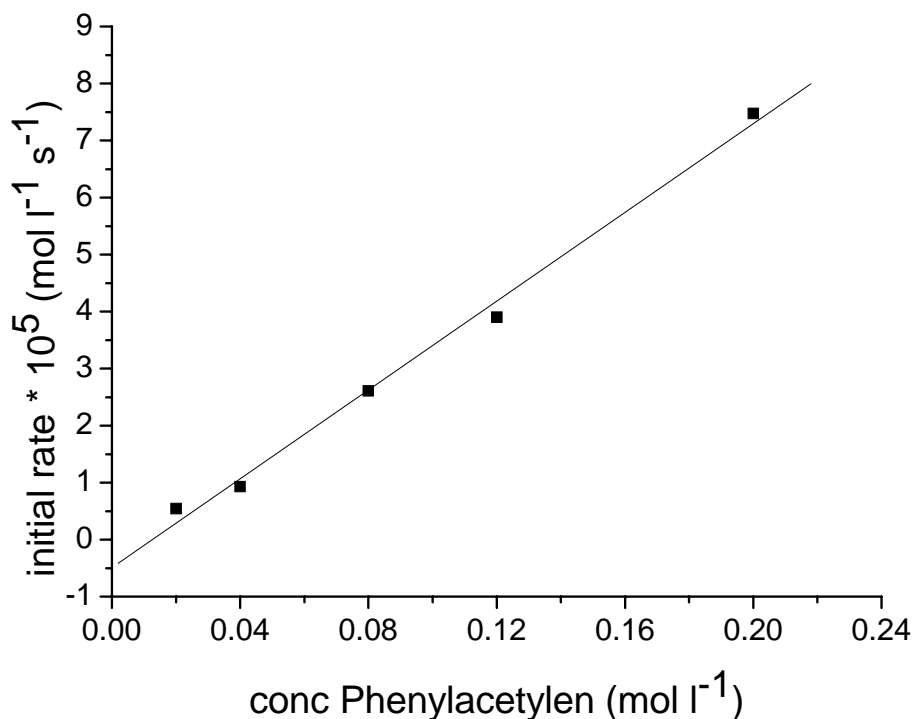

A similar analysis was carried out by reacting varying amounts of  $[\text{Cp}^*\text{Ti}(\text{N}^{\text{Xyl}}\text{N})(\text{N}-2,6\text{-C}_6\text{H}_3\text{Me}_2)]$  (**5**) (5 to 25  $\mu\text{mol}$ ) with an excess of phenylacetylene (20 molar equivalents) in toluene- $d_8$  (0.6 ml) at 10 °C. The reaction was monitored by  $^1\text{H}$  NMR spectroscopy and the concentration of the metallacyclic compound (**10**) was plotted against time. The conversion curve was line-fitted to a first order exponential decay  $A\exp(-x/b)$ ; the initial rate was estimated from  $-A/b$ , derived from differentiation of the fitted line for  $x = 0$ . A plot of the initial rate *versus* imido compound **5** concentration indicated a linear relationship (Figure S2).

Figure S2

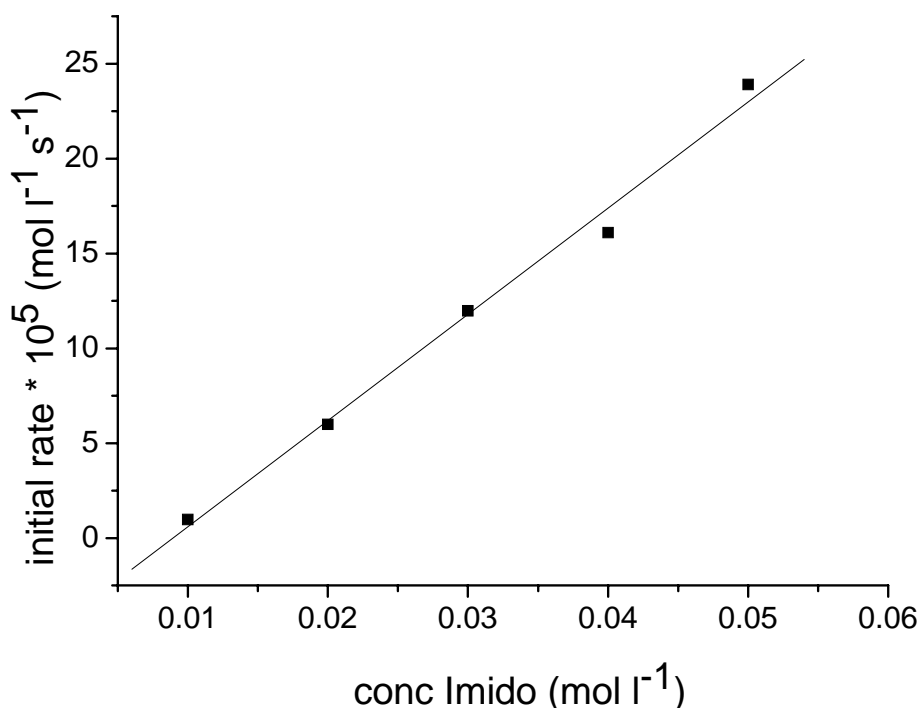

The rate of cleavage of the metallacyclic compound  $[\text{Cp}^*\text{Ti}(\text{N}^{\text{Xyl}}\text{N})\{\kappa^2\text{N}(2,6\text{-C}_6\text{H}_3\text{Me}_2)\text{CPh}=\text{CH}\}]$  (**10**) by an arylamine was determined using the method of initial rates, indicating a first order dependence on the concentration of **10** itself. Complex **10** (5 to 50  $\mu\text{mol}$ ) was reacted with 20 molar equivalents of 2,6-dimethylaniline in benzene- $d_6$  (0.6 ml) at 20 °C. The reaction was monitored by  $^1\text{H}$  NMR spectroscopy and the concentration of **10** was plotted against time, and the conversion curve was line-fitted to a first order exponential decay  $A\exp(-x/b)$ . The initial rate was estimated from  $-A/b$ , derived from differentiation of

the fitted line for  $x = 0$ . A plot of the initial rate *versus* the concentration of **10** indicated a linear relationship (Figure S3).

**Figure S3**

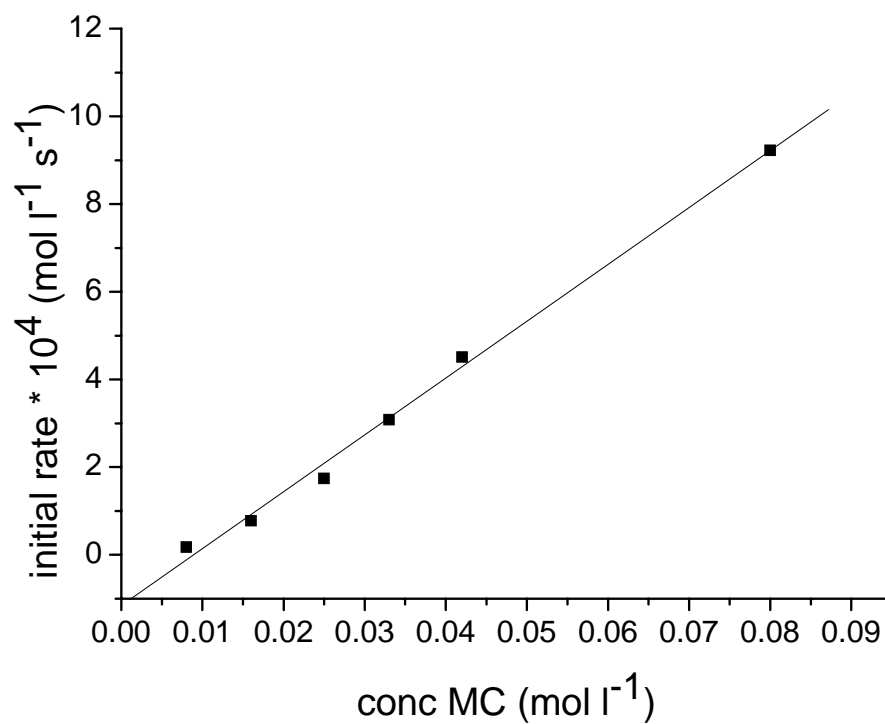

Supplement: b902038a.pdf [file b902038a.pdf]
